# Supplementary material
Source: publisher site journal article supplement (https://www.spandidos-publications.com/6398/downloadSupplementary)

Figure S1. CD44<sup>+</sup>/CD24<sup>-</sup> cells (CSC) from MDA-MB-231 and BT-549 mammospheres were isolated by magnetic-activated cell sorting and analyzed for CD44 and CD24 expression using flow cytometry. \*\*\*P<0.001. ad, adherent; CSCs, cancer stem cells.

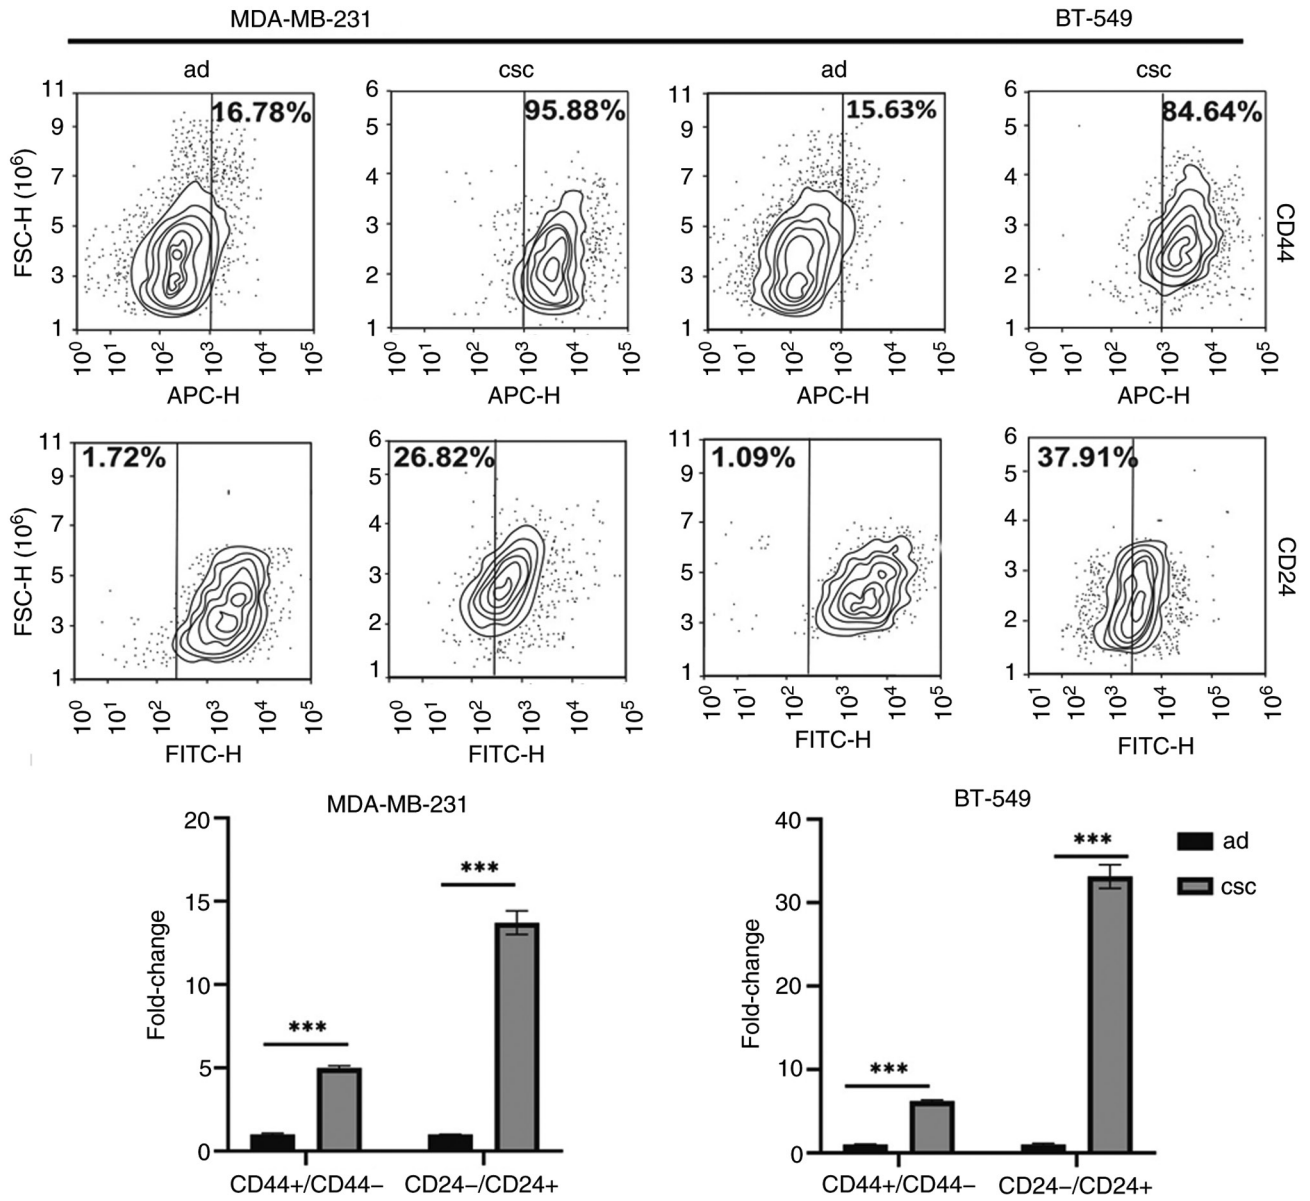

Figure S2. Proliferation curves of MDA-MB-231 and BT-549 spheroids treated with UA. The  $IC_{50}$  are labeled. (A) Proliferation curves of MDA-MB-231 spheroids treated with UA for 24 h. (B) Proliferation curves of BT-549 spheroids treated with UA for 24 h. UA, ursolic acid.

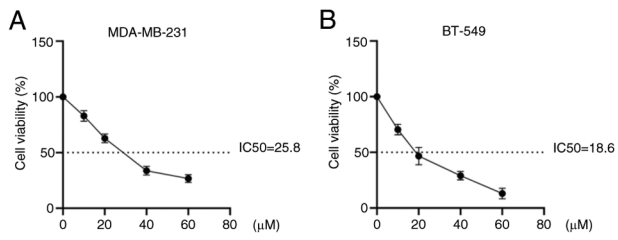

Supplement: Supplementary file 1 [file downloadSupplementary]
